# Divergent effect of mammalian PLC $\zeta$ in generating Ca<sup>2+</sup> oscillations in somatic cells compared with eggs

Sally V. PHILLIPS\*<sup>1</sup>, Yuansong YU\*<sup>1</sup>, Andreas ROSSBACH†, Michail NOMIKOS†‡, Vyronia VASSILAKOPOULOU‡, Evangelia LIVANIOU‡, Bevan CUMBES†, F. Anthony LAI†, Christopher H. GEORGE† and Karl SWANN\*<sup>2</sup>

\*Department of Obstetrics and Gynaecology, School of Medicine, Cardiff University, Heath Park, Cardiff CF14 4XN, U.K., †Department of Cardiology, School of Medicine, Cardiff University, Heath Park, Cardiff CF14 4XN, U.K., and ‡IRRP, National Center for Scientific Research, 'Demokritos' Athens, Greece

Sperm PLC $\zeta$  (phospholipase C $\zeta$ ) is a distinct phosphoinositide-specific PLC isoform that is proposed to be the physiological trigger of egg activation and embryo development at mammalian fertilization. Recombinant PLC $\zeta$  has the ability to trigger Ca<sup>2+</sup> oscillations when expressed in eggs, but it is not known how PLC $\zeta$  activity is regulated in sperm or eggs. In the present study, we have transfected CHO (Chinese-hamster ovary) cells with PLC $\zeta$  fused with either YFP (yellow fluorescent protein) or luciferase and found that PLC $\zeta$ -transfected cells did not display cytoplasmic Ca<sup>2+</sup> oscillations any differently from control cells. PLC $\zeta$  expression was not associated with changes in CHO cell resting Ca<sup>2+</sup> levels, nor with a significantly changed Ca<sup>2+</sup> response to extracellular ATP compared with control cells transfected with either YFP alone, a catalytically inactive PLC $\zeta$

or luciferase alone. Sperm extracts containing PLC $\zeta$  also failed to cause Ca<sup>2+</sup> oscillations in CHO cells. Despite these findings, PLC $\zeta$ -transfected CHO cell extracts exhibited high recombinant protein expression and PLC activity. Furthermore, either PLC $\zeta$ -transfected CHO cells or derived cell extracts could specifically cause cytoplasmic Ca<sup>2+</sup> oscillations when microinjected into mouse eggs. These data suggest that PLC $\zeta$ -mediated Ca<sup>2+</sup> oscillations may require specific factors that are only present within the egg cytoplasm or be inhibited by factors present only in somatic cell lines.

**Key words:** calcium, Chinese-hamster ovary (CHO) cell, egg, oscillation, phospholipase C (PLC), sperm.

## INTRODUCTION

PLC $\zeta$  (phospholipase C $\zeta$ ) is an isoform of phosphoinositide-specific PLC that is specifically expressed in mammalian sperm cells [1]. Microinjection of mouse PLC $\zeta$  cRNA into mouse, human or bovine eggs triggers a prolonged series of Ca<sup>2+</sup> oscillations similar to those observed at fertilization [1–5]. PLC $\zeta$  has been identified as the protein responsible for causing Ca<sup>2+</sup> oscillations in mouse eggs when either cytosolic sperm extracts or whole intact sperm are microinjected into the egg cytoplasm [1–6]. The critical level of PLC $\zeta$  protein required to trigger Ca<sup>2+</sup> release in mouse eggs is approximately 10–50 fg, which is similar to the estimated levels in a single mouse sperm [1]. Furthermore, reduced expression of PLC $\zeta$  during spermatogenesis by transgenic RNAi (RNA interference) approaches has been shown to decrease the number of Ca<sup>2+</sup> oscillations at fertilization in mouse eggs [7]. These data have led to the proposal that sperm PLC $\zeta$  is the physiological activator of mammalian development that is delivered to the egg after sperm–egg membrane fusion [1–5]. PLC $\zeta$  mediates its effects in eggs by virtue of its ability to hydrolyse PIP<sub>2</sub> (phosphatidylinositol 4,5-bisphosphate) and generate IP<sub>3</sub> (inositol 1,4,5-trisphosphate), since mutation of Asp<sup>210</sup> to an arginine residue (D210R), which is a critical residue in the PLC $\zeta$  catalytic domain, abolishes its ability to cause Ca<sup>2+</sup> oscillations or activate eggs [1]. Hence, PLC $\zeta$  can account for all of the Ca<sup>2+</sup> oscillations in eggs at fertilization since they are entirely dependent upon the stimulation of Ca<sup>2+</sup> release via the type 1 IP<sub>3</sub> receptor [4,5,8,9].

It is not known whether PLC $\zeta$  activity is regulated either in sperm or eggs. One significant feature of PLC $\zeta$  that distinguishes

it from many other mammalian PLCs is that its activity *in vitro* is retained in very low concentrations of Ca<sup>2+</sup> without the requirement for other protein factors [3,10]. PLC $\zeta$  is up to 50% active at resting cytoplasmic Ca<sup>2+</sup> concentrations [3,10]. This implies that PLC $\zeta$  would be autonomously active in generating Ca<sup>2+</sup> oscillations when it is injected into the egg cytoplasm at low concentrations. In this case it is remarkable that the sperm contains a more than 1000-fold higher PLC $\zeta$  concentration than the egg, yet sperm has a normal resting Ca<sup>2+</sup> level and undergoes controlled Ca<sup>2+</sup> oscillations in response to stimuli such as progesterone [11]. This implies that PLC $\zeta$  might be inactive in sperm and that its activity is regulated differently in sperm compared with eggs. However, the nature of this differential regulation remains unclear.

Some previous studies have characterized recombinant PLC $\zeta$  expressed in cell lines or somatic tissues [12,13]. It was reported that mouse PLC $\zeta$  expression in COS cells is associated with the generation of Ca<sup>2+</sup> oscillations [13]. Injection of boar sperm extracts (containing PLC $\zeta$ ) into hepatocytes has also been shown to trigger Ca<sup>2+</sup> oscillations [14]. These data suggest that PLC $\zeta$  can be autonomously active in somatic cells. However, another report showed that low levels of PLC $\zeta$  expressed in all tissues of transgenic mice had no discernable effect upon somatic cells, despite the fact that it activated oocytes within the ovaries of females [15]. Ca<sup>2+</sup> changes were not examined in that study, but it implies that low levels of PLC $\zeta$  may be ineffective in somatic tissues. The only known mechanism for inactivating PLC $\zeta$  is nuclear sequestration, which can account for the cessation of Ca<sup>2+</sup> oscillations after fertilization in the mouse [16,17]. However, it is unclear whether PLC $\zeta$  localization accounts for the different

Abbreviations used: AM, acetoxymethyl ester; CCD, charge-coupled-device; ICCD, intensified CCD; CHO, Chinese-hamster ovary; IP<sub>3</sub>, inositol 1,4,5-trisphosphate; OBGD, Oregon Green BAPTA [1,2-bis-(*o*-aminophenoxy)ethane-*N,N,N',N'*-tetra-acetic acid] dextran; PLC, phospholipase C; PLC $\zeta$ -luc, PLC $\zeta$ -luciferase; PIP<sub>2</sub>, phosphatidylinositol 4,5-bisphosphate; RyR2, ryanodine receptor 2; SV, signal variability; YFP, yellow fluorescent protein.

<sup>1</sup> These authors contributed equally to this work.

<sup>2</sup> To whom correspondence should be addressed (email swannk1@cardiff.ac.uk).

reports on the effect of PLC $\zeta$  expression in somatic cells. PLC $\zeta$  has been reported to be present in either the cytoplasm or the nucleus of somatic cells in a manner that may depend upon time, the cell line used or species source of PLC $\zeta$  [12,18].

In the present study, we have expressed mouse PLC $\zeta$  in CHO (Chinese-hamster ovary) cells, which have been widely used to study the mechanism of Ca<sup>2+</sup> oscillations [19]. We find that very high levels of PLC $\zeta$  expression in CHO cells has little effect upon Ca<sup>2+</sup> homeostasis, suggesting that it is inactive in these cells. Nuclear localization of PLC $\zeta$  depended upon time after transfection, but is unlikely to account for the lack of Ca<sup>2+</sup> oscillation in these cells. Remarkably we found that, despite the absence of an effect on the CHO cell Ca<sup>2+</sup> level, the PLC $\zeta$ -expressing CHO cells are able to cause Ca<sup>2+</sup> oscillations when introduced into mouse eggs, and can be extracted and shown to have a high intrinsic PLC activity.

## EXPERIMENTAL

### Cell culture and transfection

CHO cells were cultured in complete Ham's F12 medium (Invitrogen) in 5% CO<sub>2</sub> at 37°C and seeded in six-well plates or in poly-L-lysine-coated glass-bottomed culture dishes (World Precision Instruments) 24 h prior to transfection at ~80–90% confluency. For transient expression, the nuclei of cells maintained in Leibovitz L-15 media were microinjected with plasmid DNA (~10 ng/ $\mu$ l) in KCl Hepes buffer [20] with 2.5 mg/ml Alexa Fluor<sup>®</sup> 594-dextran (10000 Da molecular mass) or 0.5 mM OBGD {Oregon Green BAPTA [1,2-bis-(*o*-aminophenoxy)ethane-*N,N,N',N'*-tetra-acetic acid] dextran (Invitrogen)} using a Femtojet and InjectMan NI2 (Eppendorf) with an injection pressure of 90 hPa. The injection system was mounted on an Axiovert 200 fluorescence microscope (Zeiss). After injecting 50–100 cells, the medium was exchanged back to Ham's F12 and cells were returned to the incubator prior to imaging. For stable expression, CHO cells were transfected with DNA Lipofectamine<sup>™</sup> 2000 (Invitrogen) and then incubated for 16–18 h prior to testing for heterologous PLC $\zeta$  expression. PLC $\zeta$ -expressing cells were selected on the basis of resistance to G418 by using an increasing concentration of G418 (0–1 mg/ml in 100  $\mu$ g increments), and cells exhibiting appreciable YFP (yellow fluorescent protein) fluorescence were enriched using FACS (DakoCytomation, MoFlo). The PLC $\zeta$ -luc (PLC $\zeta$ -luciferase) fusion protein construct was made in a pCR3 vector (Invitrogen) as described previously [10]. The YFP-PLC $\zeta$  construct was made in pcDNA3.1 with YFP placed at the N-terminus of PLC $\zeta$ . The eYFP (enhanced YFP)-<sup>D210R</sup>PLC $\zeta$  construct was derived from YFP-PLC $\zeta$  by site-directed mutagenesis of Asp<sup>210</sup> to arginine using the Stratagene QuikChange<sup>®</sup> XL site-directed mutagenesis kit.

### Injection of eggs with extracts or cells

Metaphase II mouse eggs were collected and microinjected with ~10 pl of extracts (approximately 5% of the egg volume) as described previously [10,20]. To make cell extracts, CHO cells (~2 × 10<sup>7</sup>) stably transfected with YFP-fusion constructs were harvested by trypsinization and then pelleted and resuspended several times in KCl Hepes buffer [10]. Cells were lysed with three cycles of freeze–thaw using liquid nitrogen, before being subjected to ultracentrifugation at 55 000 rev./min (rotor Beckman TLA 100.4) for 1 h at 4°C. The resulting supernatant was concentrated using centrifugal filters and stored at –80°C. Microinjection of cells was performed using a Piezo micro-

manipulator (PrimeTech) that mimics the process of somatic cell nuclear transfer [21]. Single CHO cells were drawn into the end of a pipette narrow enough to rupture their cell membrane then immediately injected into a mouse egg by application of low pressure. Before injection, eggs were loaded with either fura red or fura PE3 by incubation for 30 min in 2–4  $\mu$ M of the AM (acetoxymethyl ester) forms for the dyes. Small groups of eggs were microinjected with cell or sperm extracts, or cells, and then rapidly transferred to the imaging microscope. Ca<sup>2+</sup> was measured in eggs by monitoring fluorescence with a Nikon TiU epifluorescence microscope equipped with a Coolsnap HQ<sub>2</sub> CCD (charge-coupled-device) camera (Photometrics), with excitation light of 430 nm/490 nm (emission measured with a 615 nm long-pass filter) for fura red, and excitation of 350 nm/380 nm (emission measured at 535nm) for fura PE3, or excitation of 550 nm and an emission of 600 nm for Rhod dextran.

### Microinjecting CHO cells with sperm extracts

Boar sperm extracts (~5 mg/ml) were prepared as the cytosolic protein fraction in a similar manner to that of lysed pig sperm, as described previously [15]. Sperm extracts were mixed with an equal volume of 10000 Da molecular mass dextran conjugated with Alexa Fluor<sup>®</sup> 647 (Invitrogen) and microinjected into confluent fluo3-loaded CHO cells [22] using injection pressures of 120–140 hPa. The successful transduction of exogenous material into cells was confirmed by visualizing Alexa Fluor<sup>®</sup> 647 fluorescence using a 633 nm He/Ne laser fitted to an SP2 confocal laser-scanning microscope (Leica Microsystems). Following microinjection, Ca<sup>2+</sup>-dependent fluo3 signals were acquired at 1 Hz for 20 min as described previously [14]. Post-Ca<sup>2+</sup> imaging, data was only analysed from those cells that retained >75% of their initial Alexa Fluor<sup>®</sup> 647 fluorescence.

### PLC assays and Western blot analysis

PIP<sub>2</sub> hydrolytic activity of PLC present in YFP- or YFP-PLC $\zeta$ -transfected CHO cell extracts was assayed as described previously [10]. The assay mixture final volume was 50  $\mu$ l containing 100 mM NaCl, 0.4% sodium cholate, 2 mM CaCl<sub>2</sub>, 4 mM EGTA, 20  $\mu$ g of BSA, 5 mM 2-mercaptoethanol and 20 mM Tris/HCl (pH 6.8). The PIP<sub>2</sub> concentration in the reaction mixture was 220  $\mu$ M, containing 0.05  $\mu$ Ci of [<sup>3</sup>H]PIP<sub>2</sub>. Assay conditions were optimized for linearity, requiring a 10 min 25°C incubation with 20 pmol of protein. Transfected CHO cell line proteins were separated by SDS/PAGE and immunoblot analysis was performed as described previously [10]. Proteins were probed with a peptide affinity-purified rabbit anti-PLC $\zeta$  polyclonal antibody (1:10000 dilution) generated against the EF-hand domain (amino acid residues 16–31).

### CHO cell imaging

Luciferase expression was monitored from cells incubated in 100  $\mu$ M luciferin using an Axiovert 100 microscope (Carl Zeiss) with a ×40, 1.4 NA (numerical aperture) oil-immersion objective lens and a cooled ICCD (intensified CCD) camera (Photek) [20]. Luminescence was collected for 20 min and then Ca<sup>2+</sup> was monitored in the same cells for ~1 h using low-level fluorescence excitation light from a halogen lamp with a 490 nm excitation filter. Fluorescence from these cells was integrated every 10 s with sensitivity of the ICCD at 10% [20]. Resting Ca<sup>2+</sup> concentrations were estimated using the equation

$$\text{Ca}^{2+} = K_d(F_{\text{max}} - F)/(F - F_{\text{min}})$$

with  $F_{\min}$  taken as zero and the  $K_d$  for OGBD in cytoplasm taken as 430 nM [23]. The  $F_{\max}$  was obtained by adding ionomycin to saturate the fluorescence of OGBD or fluo3. Cells expressing YFP-fusion proteins were imaged with either a confocal or wide-field microscope. For confocal imaging we used a TCS SP5 and a DMI 6000 inverted microscope (Leica). Cells were imaged with a  $\times 63$ , 1.23 NA oil-immersion objective lens, and a  $512 \times 512$  pixel resolution. The YFP, fluo3 and fura red fluorescence was excited with the 488 nm laser line with emission at 510–540 nm for YFP or fluo3, and at 580–610 nm for fura red fluorescence. Alexa Fluor<sup>®</sup> 594 fluorescence was visualized using the 561 nm He/Ne laser and emission at 600–630 nm. For wide-field imaging we used a Nikon TiU epifluorescence microscope with a Photometrics Coolsnap HQ<sub>2</sub> CCD camera equipped with excitation and emission filter wheels. Excitation was with a 490 nm and 420 nm band-pass filter, and emission was monitored with a 530 nm band-pass filter (for YFP) or a 620 long-pass filter (for fura red). Where specified, cells were loaded with the Ca<sup>2+</sup> indicator dyes by incubation in 10  $\mu$ M of the AM form in non-supplemented Ham's F12 medium for 60–90 min before being washed and transferred to Krebs–Ringer–Hepes buffer [22,24]. For the confocal analysis of intracellular Ca<sup>2+</sup> transients, cells were imaged every 100 ms for 100 frames before the addition of ATP (100  $\mu$ M) and imaging for a further 500 frames (1 min total). SV (signal variability) is an index of the magnitude of amplitude and temporal characteristics of Ca<sup>2+</sup> fluxes during steady-state Ca<sup>2+</sup> cycling processes [22,24]. For SV analysis, data was acquired every 100 ms for 30 s. Following an experimental series, 15–20 cells were selected per area (typically four to six areas per dish), and data were analysed from ROIs (regions of interest) of  $\sim 40 \mu\text{m}^2$  ( $> 150$  pixels) using Leica software. Further analysis was carried out using Microsoft Excel and GraphPad Prism. Derivation of mathematical operations used to calculate SV is given in a previous paper [23]. For wide-field imaging of YFP-transfected cells, an initial YFP image was collected, and the fura red images were collected every 10 s with a 420 nm/490 nm excitation, and data were analysed using Image-Pro Plus and Sigma Plot. Results were analysed for significance using ANOVA or a Student's *t* test.

## RESULTS

### Expression of PLC $\zeta$ -luc in CHO cells

PLC $\zeta$ -luc has previously been shown to trigger Ca<sup>2+</sup> oscillations when expressed in mouse eggs [10]. CHO cells were microinjected with cDNA encoding either PLC $\zeta$ -luc or luciferase, together with the Ca<sup>2+</sup> indicator OGBD. Figure 1(a) shows a luminescence image from a typical group of PLC $\zeta$ -luc expression plasmid-injected cells indicating successful transient expression of the fusion protein, as reported by the corresponding fluorescence image of OGBD specifically in injected cells (Figure 1b). Intracellular Ca<sup>2+</sup> was measured in PLC $\zeta$ -luc-expressing cells 3, 5 and 24 h following microinjection, and the mean luminescence in single CHO cells expressing PLC $\zeta$ -luc was in the range of 1–10 cps, compared with a range of 1–15 cps from cells injected with control luciferase vector. Figure 1(c) shows typical recordings of Ca<sup>2+</sup> levels in PLC $\zeta$ -luc and luciferase control cells, as well as OGBD control injected cells, 3 h after microinjection. It can be seen that there were small low-frequency Ca<sup>2+</sup> oscillations in all three types of cells, but there was no clear difference between PLC $\zeta$ -transfected cells and other cells transfected or not (see Table 1). Since CHO cells express the endogenous purinergic P2Y1, P2Y2 and P2X7 receptors, they were tested for responsiveness to extracellular ATP [25]. All

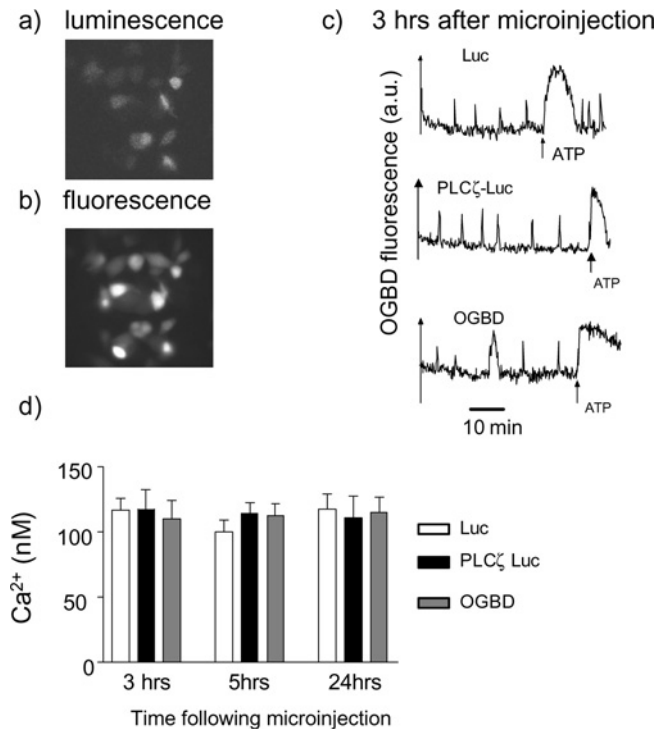

**Figure 1** Ca<sup>2+</sup> dynamics in CHO cells expressing PLC $\zeta$ -luc

Luminescence (a) and fluorescence (b) images are shown of a representative group of CHO cells injected with plasmid DNA encoding PLC $\zeta$ -luc and OGBD. Note that not all of the injected cells (shown by fluorescence) are expressing luciferase (shown by the luminescence). (c) Representative recordings of fluorescence from OGBD in arbitrary units (a.u.) indicating Ca<sup>2+</sup> changes observed in cells within each experimental group. Cells were imaged for fluorescence for at least 30 min prior to the addition of ATP (100  $\mu$ M, at the arrow). The histogram in (d) shows the mean  $\pm$  S.E.M. for the resting Ca<sup>2+</sup> levels, estimated after the addition of ionomycin, for CHO cells injected with luciferase or PLC $\zeta$ -luc DNA, as well as control cells injected with OGBD only. There was no significant difference in the resting Ca<sup>2+</sup> levels between the different groups of cells at any one time point (ANOVA).

of the cells underwent a single large rise in Ca<sup>2+</sup> in response to ATP (Figure 1c). Table 1 summarizes data from transfected cells analysed at 3, 5 and 24 h post-microinjection. At all three time points there were no differences in the proportion of cells showing low-frequency Ca<sup>2+</sup> oscillations, or in those showing a Ca<sup>2+</sup> increase in response to addition of ATP, between PLC $\zeta$ -luc and luciferase control CHO cells and control OGBD-injected cells (see Table 1). The resting Ca<sup>2+</sup> levels in CHO cells were estimated by the addition of a Ca<sup>2+</sup> ionophore. Figure 1(d) shows that the resting Ca<sup>2+</sup> levels were not significantly different between PLC $\zeta$ -luc or luciferase control cells, or in comparison with OGBD-injected cells, at either 3, 5 or 24 h after microinjection. These data suggest that transient PLC $\zeta$ -luc expression does not have a significant effect upon Ca<sup>2+</sup> homeostasis in CHO cells. The presence of low-frequency small amplitude Ca<sup>2+</sup> oscillations in some CHO cells evidently occurs in these cells under certain conditions.

### Localization of YFP-PLC $\zeta$ in CHO cells

Nuclear sequestration of PLC $\zeta$  appears to cause the cessation of Ca<sup>2+</sup> oscillations in mouse eggs and could account for the lack of CHO cell Ca<sup>2+</sup> oscillations in the above experiments [16,17]. We examined the distribution of PLC $\zeta$  using a YFP-tagged PLC $\zeta$  which, similar to VenusGFP-PLC $\zeta$  (GFP

**Table 1 Analysis of Ca<sup>2+</sup> dynamics in CHO cells**

CHO cells were injected with OGBD + plasmid DNA encoding luciferase or PLC $\zeta$ -luc, or were injected with OGBD alone. Cells were imaged for OGBD fluorescence at 3, 5 and 24 h following microinjection. Values are given as means  $\pm$  S.E.M.  $n$  = the number of experimental runs. The total number of cells analysed is shown in parentheses.

| (a) 3 h          |                                 |                      |                                       |                       |
|------------------|---------------------------------|----------------------|---------------------------------------|-----------------------|
| Injection        | Percentage of cells oscillating | Frequency (spikes/h) | Percentage of cells responding to ATP | $n$ (number of cells) |
| Luciferase       | 35.1 $\pm$ 3.6                  | 6.9 $\pm$ 0.9        | 99.8 $\pm$ 0.3                        | 4 (47)                |
| PLC $\zeta$ -luc | 36.0 $\pm$ 3.0                  | 7.9 $\pm$ 1.0        | 99.3 $\pm$ 0.5                        | 4 (45)                |
| OGBD             | 31.9 $\pm$ 3.7                  | 7.0 $\pm$ 0.7        | 100                                   | 3 (18)                |
| (b) 5 h          |                                 |                      |                                       |                       |
| Luciferase       | 25.1 $\pm$ 8.6                  | 6.0 $\pm$ 0.9        | 100                                   | 4 (29)                |
| PLC $\zeta$ -luc | 31.0 $\pm$ 3.2                  | 5.7 $\pm$ 0.6        | 99.8 $\pm$ 0.3                        | 4 (50)                |
| OGBD             | 31.1 $\pm$ 5.9                  | 6.0 $\pm$ 0.9        | 100                                   | 3 (13)                |
| (c) 24 h         |                                 |                      |                                       |                       |
| Luciferase       | 31.0 $\pm$ 4.8                  | 5.9 $\pm$ 0.8        | 99.0 $\pm$ 0.4                        | 4 (22)                |
| PLC $\zeta$ -luc | 33.4 $\pm$ 3.9                  | 6.2 $\pm$ 1.0        | 99.0 $\pm$ 0.6                        | 4 (21)                |
| OGBD             | 29.0 $\pm$ 2.4                  | 6.5 $\pm$ 0.8        | 99.3 $\pm$ 0.3                        | 4 (14)                |

is green fluorescent protein), is also effective in causing Ca<sup>2+</sup> oscillations in mouse eggs (see Supplementary Figure S1a at <http://www.BiochemJ.org/bj/438/bj4380545add.htm>). Figure 2(a) shows confocal images of CHO cells at 3, 5, 24 and 48 h after being injected with the YFP-PLC $\zeta$  expression plasmid. Distinct levels of recombinant YFP expression were detected as early as 3 h after DNA microinjection and persisted for at least 48 h for all of the DNA constructs examined. Expression of YFP alone was homogeneous throughout the nucleus and cytoplasm in all cells. In contrast, YFP-PLC $\zeta$  showed two distinct patterns of localization. At 3 and 5 h post-injection, all cells showed a cytoplasmic distribution, whereas after 24 and 48 h the majority of cells showed nuclear translocation with enhanced staining in the nucleoli. Some cells that did not show obvious nuclear translocation at 24 and 48 h maintained a clear cytoplasmic distribution identical with that observed at 3 and 5 h. Unlike YFP-PLC $\zeta$ , YFP-D<sup>210R</sup>PLC $\zeta$  did not show any obvious signs of nuclear accumulation at any time points, and the majority of cells (>90 %) maintained the same cytoplasmic localization.

As well as studying transiently transfected CHO cells, we also examined the distribution of PLC $\zeta$  in stable cell lines. We prepared CHO cell lines that stably expressed YFP-PLC $\zeta$  or YFP alone after two rounds of cell sorting. Figure 2(b) shows that after such sorting there was a clear difference in YFP channel fluorescence between selected cells and the wild-type CHO cells. The distribution of YFP-PLC $\zeta$  in CHO cells was variable and again could be seen in either the cytoplasm or the nucleus (Figure 2b). Along with the transient transfection studies, these data support the previous observations that PLC $\zeta$  can localize to the nucleus of cells [12]. However, since localization does not occur in all cells or takes more than 5 h, this suggests that nuclear translocation cannot account for its apparent inactivity in CHO cells.

### Ca<sup>2+</sup> homeostasis in YFP-PLC $\zeta$ -transfected CHO cells

Following microinjection of CHO cells with YFP-PLC $\zeta$ , we measured cytoplasmic Ca<sup>2+</sup> changes using confocal microscopy. We studied the response of transduced cells to the addition of ATP, as described above with PLC $\zeta$ -luc-expressing cells, but the faster rate of image acquisition (10 Hz) enabled by confocal microscopy permits a more detailed kinetic analysis of basal Ca<sup>2+</sup> handling

and ATP-evoked Ca<sup>2+</sup> release in these cells. Cells were loaded with fluo3 and, after exposure to ATP, the amplitude and relative change in fluorescence was taken as a measure of response for YFP-, YFP-PLC $\zeta$ - and YFP-D<sup>210R</sup>PLC $\zeta$ -transfected cells, and for control-injected cells. The initial increase in Ca<sup>2+</sup> was unaffected by the removal of extracellular Ca<sup>2+</sup>, indicating that P2Y and IP<sub>3</sub>-dependent intracellular Ca<sup>2+</sup> store release was involved (S. Phillips and K. Swann, unpublished work). Figure 3(a) shows examples of the Ca<sup>2+</sup> response to a maximal concentration of ATP (at the arrow) for all four cell types, which consisted of a large and rapid response followed by a gradual decline, as shown in Figure 1(c). The responses in Figure 3(a) are at 5 and 24 h, but similar results were seen at 3 and 48 h after DNA injection. Figure 3(b) summarizes the data from for all four types of cells, at all time points. There was no difference in the proportion of cells responding to ATP, the relative amplitude of the Ca<sup>2+</sup> rise or in the time to peak of the Ca<sup>2+</sup> rise evoked by ATP at any of the different times after microinjection of DNA. These data again suggest that P2Y-receptor-driven IP<sub>3</sub> production and Ca<sup>2+</sup> store release is unaltered by PLC $\zeta$  expression.

The use of YFP-PLC $\zeta$  and confocal microscopy allowed us to examine more subtle changes in Ca<sup>2+</sup> homeostasis than may be revealed by the experiments described above. Previous studies of cardiac RyR2 (ryanodine receptor 2)-transfected CHO cells have shown that there is an increased variability in resting cytoplasmic Ca<sup>2+</sup> fluxes associated with heterologous expression of RyR2 [22,24]. Such SV is an index that robustly describes the signal noise in the basal Ca<sup>2+</sup>-dependent fluorescence from Ca<sup>2+</sup> dyes in the cell cytoplasm, and has previously been used to characterize subtle perturbations of steady-state Ca<sup>2+</sup> cycling and their functional consequences (e.g. induction of apoptosis) [22,24]. To examine whether recombinant expression of YFP-PLC $\zeta$  resulted in subtle changes to CHO cell Ca<sup>2+</sup> handling, we monitored Ca<sup>2+</sup> with fura red since the emission peaks of YFP and fura red are separated by >100 nm. Figure 3(b) (bottom right-hand panel) shows the analysis of fura red fluorescence noise as measured by SV for YFP, YFP-PLC $\zeta$  and YFP-D<sup>210R</sup>PLC $\zeta$ -transfected cells, and for control-injected cells at 5 h and 24 h after microinjection. There was no difference observed in the SV from all four groups of cells. These experiments suggest that there are no subtle alterations in Ca<sup>2+</sup> homeostasis in CHO cells expressing YFP-PLC $\zeta$ , supporting the conclusion that the YFP-PLC $\zeta$  expressed is functionally inactive in CHO cells.

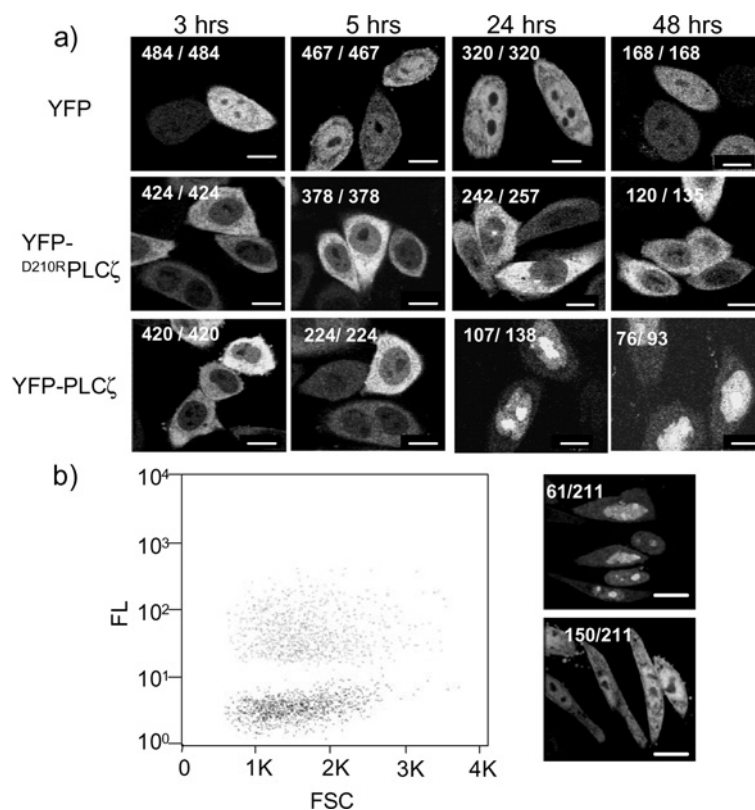

**Figure 2** Localization of YFP-PLC $\zeta$  expressed in CHO cells

(a) Localization of YFP, the enzymatically inactive YFP-D210R-PLC $\zeta$  mutant and YFP-PLC $\zeta$ , in transiently transfected CHO cells. Confocal images acquired at different times after microinjection are indicated by the times above the panels. Each image is representative of the pattern of localization observed in the majority of cells at each time point. The number of cells displaying the indicated localization pattern is shown in white followed by the total number of cells analysed in each instance. The scale bars represent 10  $\mu$ m. (b) FACS analysis of cells sorted for expression of YFP-PLC $\zeta$  with expressing cells above in grey and control CHO cells below in black. The fluorescence (F) is plotted for cells against the forward scatter (FSC). On the right-hand side are two confocal fluorescence images of cells with either nuclear or overall staining of YFP-PLC $\zeta$ , with again the proportion of cells with the pattern shown indicated by the numbers on each image.

As well as examining Ca<sup>2+</sup> dynamics in CHO cells transiently expressing recombinant protein, we analysed Ca<sup>2+</sup> in the YFP-PLC $\zeta$  stable cell lines and studied the Ca<sup>2+</sup> response to a full range of ATP concentrations. Figure 4(a) shows the Ca<sup>2+</sup> transients generated by different concentrations of ATP in control CHO cells and in YFP-PLC $\zeta$ -transfected cells. We categorized the cell populations into those that expressed high or low levels of recombinant protein, based on the FACS YFP fluorescence signals, and analysed the populations on this basis. As with the transient transfections, there were no differences in the Ca<sup>2+</sup> response to high concentrations of ATP. Nevertheless, the data shown in Figure 4 indicate that, for low concentrations of ATP, a smaller proportion of both types of YFP-PLC $\zeta$ -expressing cells responded with a Ca<sup>2+</sup> transient. The response in YFP-PLC $\zeta$  cells was also significantly delayed compared with control CHO cells (Figure 4b). However, this small difference in response was independent of the expression level of YFP-PLC $\zeta$  since it was equivalent in those cells expressing either high or low levels of YFP-PLC $\zeta$  recombinant protein.

The lack of any dramatic change in Ca<sup>2+</sup> homeostasis in YFP-PLC $\zeta$ -expressing cells (Figure 3b) did not appear to be due to any degradation of the PLC portion of the YFP-PLC $\zeta$  fusion protein, nor in any loss of its intrinsic PLC activity. We made cytosolic extracts from YFP-PLC $\zeta$  cells and tested them for PLC $\zeta$  activity and expression. We specifically assayed PLC activity of cells in a mixed micelle assay with a free Ca<sup>2+</sup> concentration at 200 nM which is near maximal for stimulating PLC $\zeta$ , but below the

level required for stimulating most somatic PLC isoforms [3,10]. Figure 5(a) shows that cytosolic extracts made from YFP-PLC $\zeta$ -expressing cells had a much higher PLC activity *in vitro* compared with control YFP-transfected cells. This is consistent with the robust expression of the full-length YFP-PLC $\zeta$  fusion protein (103 kDa), as illustrated by the clear immunoreactive protein of ~100 kDa recognized by an affinity-purified anti-PLC $\zeta$  antibody on the Western blot (Figure 5b).

#### CHO-cell-expressed YFP-PLC $\zeta$ causes Ca<sup>2+</sup> oscillations in mouse eggs

One reason why PLC $\zeta$  may not be active in somatic cells could be a requirement for a specific factor(s) present only within the egg. To test this idea we sought to introduce recombinant PLC $\zeta$  synthesized in CHO cells into mouse eggs. Cell extracts were prepared from untransfected CHO cells (negative control) or from cells exhibiting stable expression of YFP (~73.4  $\pm$  0.6% positively labelled), or else YFP-PLC $\zeta$  (97.6  $\pm$  0.1% positively labelled). These extracts were prepared in the same way as described previously for making cytosolic sperm extracts [1,26]. Figure 6(a) shows that injecting a ~5% volume of YFP-PLC $\zeta$  CHO cell extract into mouse eggs triggered a series of Ca<sup>2+</sup> oscillations in all eggs injected ( $n = 14$ ). The frequency of the Ca<sup>2+</sup> oscillations observed was 11.4  $\pm$  1.4 spikes/h, which persisted for the duration of the recording (typically 1–1.5 h).

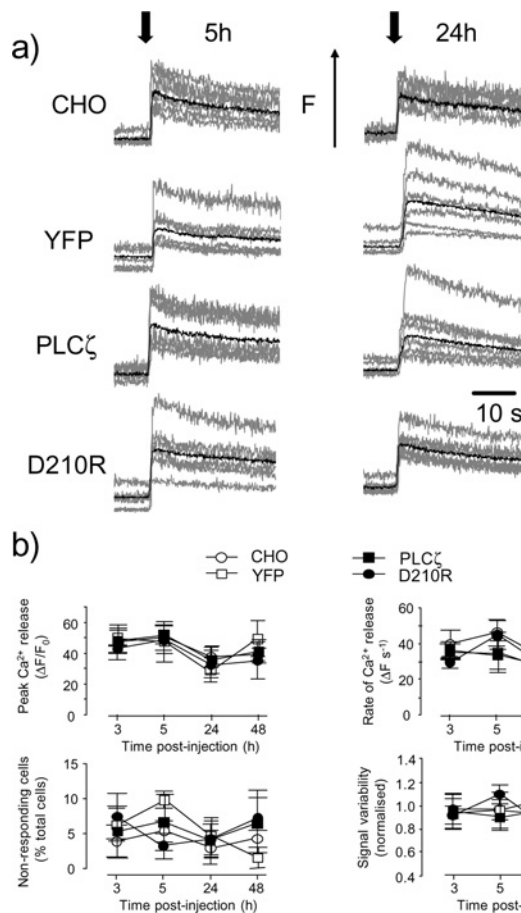

**Figure 3** Expression of PLC $\zeta$  has no effect on the ATP-induced Ca<sup>2+</sup> transient in transiently transfected CHO cells

(a) Groups of sample traces of fluo3 fluorescence increases in response ( $F$  in arbitrary units) to addition of 100  $\mu\text{M}$  ATP. The responses are shown for control CHO cells and for cells expressing YFP alone, YFP-PLC $\zeta$ , or YFP-D210R PLC $\zeta$ , at 5 h and 24 h after injection of DNA. Data obtained from six discrete cells randomly distributed across the field of view is shown (grey) with the average of that group plotted in black. (b) The analysis of parameters of the ATP-induced Ca<sup>2+</sup> transient at time points between 3 and 24 h in control CHO cells ( $\circ$ ), and for cells expressing YFP ( $\square$ ), YFP-D210R PLC $\zeta$  ( $\bullet$ ) or YFP-PLC $\zeta$  ( $\blacksquare$ ). Data are given as means  $\pm$  S.E.M. ( $n = 4$  separate experiments each). Each time point analysis involved 43–480 individual cells, and there were no significant differences between any of the groups of cells at the time points of experiments (ANOVA).

These Ca<sup>2+</sup> oscillations are similar in form to those previously described after injection of mouse eggs with cytosolic sperm extracts [26]. Injection of extracts from untransfected CHO cells or YFP-transfected CHO cells did not cause any changes in Ca<sup>2+</sup> in mouse eggs (Figure 6b).

We also tested the activity of PLC $\zeta$  expressed in CHO cells by directly injecting these cells into the egg cytoplasm in the manner used in the somatic cell transfer procedure [21]. Intracellular Ca<sup>2+</sup> was monitored immediately following microinjection of either untransfected CHO cells (negative control) or cells expressing YFP-PLC $\zeta$  (from an enriched stable cell population). Single CHO cells were injected into single mouse eggs and then transferred to the fluorescence imaging system within 1–2 min. Figure 6(c) shows that the injection of cells expressing YFP-PLC $\zeta$  induced a series of repetitive Ca<sup>2+</sup> oscillations in the majority (15/23) of eggs. As was observed with the CHO cell extract injections, the egg Ca<sup>2+</sup> response to single CHO cell injection displayed rapid spikes, with the initial transient taking place within minutes of the cell injection. The frequency of the

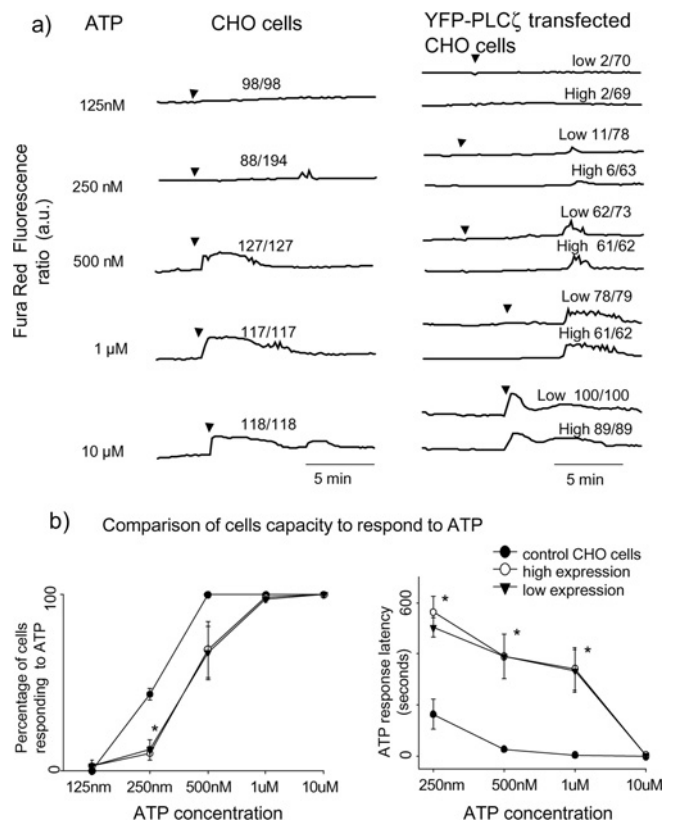

**Figure 4** ATP-induced Ca<sup>2+</sup> transient responses of YFP-PLC $\zeta$  stably transfected CHO cells

(a) Wild-type CHO cells stably transfected with YFP-PLC $\zeta$  were stimulated by the addition of ATP over a range of concentrations, and the Ca<sup>2+</sup> response was monitored by the fura red fluorescence ratio (in arbitrary units). The concentration of ATP added (at the arrowhead), is shown on the left-hand side and the proportion of cells showing the displayed response is indicated above each trace. The YFP-PLC $\zeta$  cells were divided into 'high' and 'low' level expression depending upon the level of YFP fluorescence (see Supplementary Figure S1b at <http://www.BiochemJ.org/bj/438/bj4380545add.htm>), and the data are plotted for each class separately. (b) Dose-response curves are plotted for cells in terms of the percentage of cells showing a Ca<sup>2+</sup> increase as well as the latency between the addition of ATP and the start of the Ca<sup>2+</sup> transient. Data are plotted for control CHO cells ( $\bullet$ ), and again for cells expressing high ( $\circ$ ) compared with low ( $\blacktriangledown$ ) levels of YFP-PLC $\zeta$ . \* $P < 0.05$  (Student's  $t$  test), significantly different from control CHO cells.

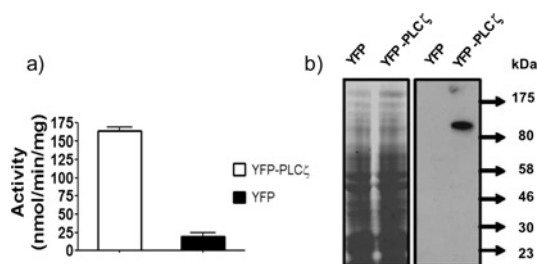

**Figure 5** PLC enzyme activity and expression of YFP-PLC $\zeta$  in stably transfected CHO cells

Cells that had been sorted for stable expression of YFP-PLC $\zeta$  were used to make cytosolic extracts. (a) PLC enzymatic activity in cell extracts is shown for YFP-PLC $\zeta$ -transfected cells (open bar) and control YFP-transfected CHO cells (closed bar). The specific activity was 165  $\pm$  9 nmol/min per mg for YFP-PLC $\zeta$ -transfected cells, and 23  $\pm$  10 nmol/min per mg for YFP control-transfected cells. (b) Coomassie Blue-stained SDS gel (left-hand panel) and a Western blot (right-hand panel) for the same batches of extracts. The Western blot was developed following incubation with an affinity-purified rabbit polyclonal antibody against PLC $\zeta$ . The molecular mass in kDa is indicated on the right-hand side.

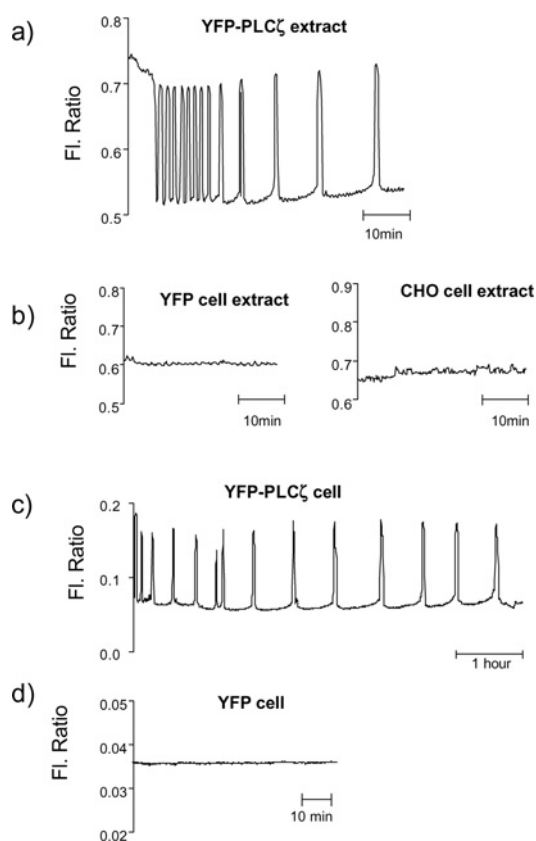

**Figure 6**  $\text{Ca}^{2+}$  dynamics in mouse eggs after injection of CHO cell or CHO cell extracts

Intracellular  $\text{Ca}^{2+}$  responses in mouse eggs were monitored following the microinjection of extracts prepared from CHO cells. (a) A representative trace after injection of extract prepared from the YFP-PLC $\zeta$  cell line is shown.  $\text{Ca}^{2+}$  oscillations were seen in 14/14 eggs ( $11.4 \pm 1.4$  spikes/h). (b) Extracts from YFP-transfected or non-transfected CHO cells produced no  $\text{Ca}^{2+}$  response in any of the six or four eggs injected respectively. The recording in (c) is from an egg injected with a whole CHO cell that was expressing YFP-PLC $\zeta$ .  $\text{Ca}^{2+}$  oscillations were seen in 15/23 such whole CHO cell-injected eggs ( $4.3 \pm 0.8$  spikes/h). (d) An example of an egg injected with a whole CHO cell expressing YFP alone. No  $\text{Ca}^{2+}$  response was observed in any of the 14 eggs injected. Each trace is a recording from a single egg and is representative of the observations made in each experimental group. Traces (a) and (b) were recorded with the use of fura red, whereas (c) and (d) used fura-PE3.

$\text{Ca}^{2+}$  oscillations observed was  $4.3 \pm 0.8$  per h, which persisted for the duration of the recording and is similar to that seen during mouse egg fertilization [2,4]. In contrast, Figure 6(d) shows that no change in intracellular  $\text{Ca}^{2+}$  occurred following microinjection of negative control cells. These data suggest that the YFP-PLC $\zeta$ -transfected CHO cells are expressing YFP-PLC $\zeta$  at levels capable of inducing  $\text{Ca}^{2+}$  oscillations in mouse eggs. Furthermore, the rapid onset of  $\text{Ca}^{2+}$  oscillations following injection into egg cytoplasm suggests that the PLC $\zeta$  expressed in CHO cells exhibits full functional activity.

Since PLC $\zeta$  appears to be inactive in CHO cells we considered whether this might be due to an intrinsic inability of these cells to respond to PLC $\zeta$ . Previously, sperm extracts were used as a source of an endogenously active  $\text{Ca}^{2+}$ -releasing factor and they contain high levels of PLC $\zeta$  [1]. We made cytosolic boar sperm extracts and microinjected them into CHO cells. Figures 7(a)–7(d) show experiments in which boar sperm extracts were injected into cells along with a fluorescent tracer dye. In all cases, the injection of such sperm extracts failed to cause any changes in resting  $\text{Ca}^{2+}$ , and their response to sperm extracts was indistinguishable from

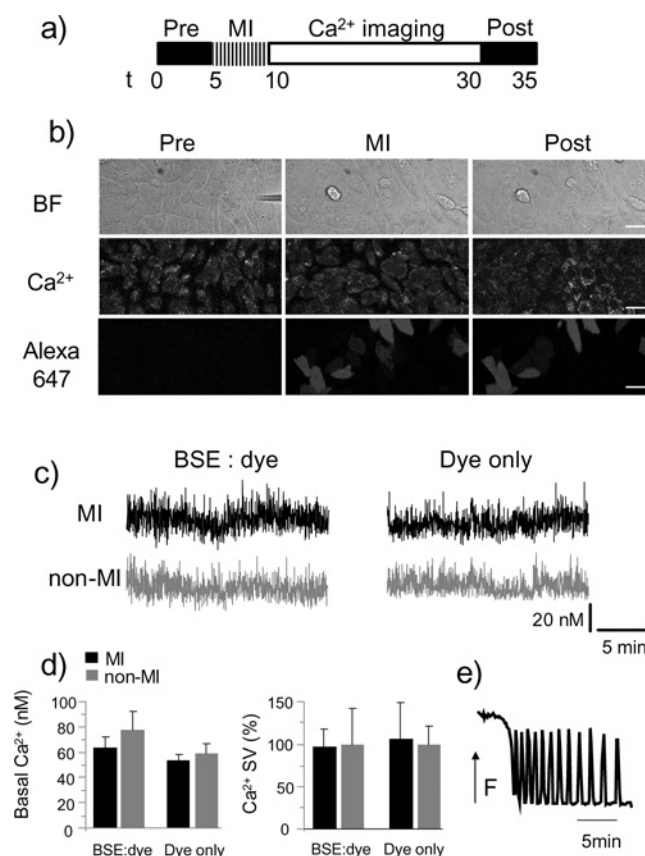

**Figure 7** Microinjection of YFP-PLC $\zeta$ -transfected cell extracts into control CHO cells

Boar sperm extracts were microinjected into control CHO cells and then imaged for 20 min. The protocol for the experiments is shown in (a) and images in (b) were taken before (Pre), during and after (Post) the microinjection (MI) of extracts. The sample images in (b) show a bright-field (BF) image of cells, the  $\text{Ca}^{2+}$ -dependent fluorescence of fluo3 ( $\text{Ca}^{2+}$ ), and the fluorescence of the Alexa Fluor<sup>®</sup> 647 tracer (Alexa 647) that was used to visualize successful injection. In (c) the black traces show typical fluo3 fluorescence recordings from the 'Ca<sup>2+</sup> imaging' phase of the experiment (time 10–30 min, a) following microinjection (MI) with boar sperm extract (BSE) mixed with Alexa Fluor<sup>®</sup> 647 (BSE:dye), or injection of Alexa Fluor<sup>®</sup> 647 alone (Dye only). Representative traces obtained from those cells that had not been microinjected (non-MI), but were present in the same field of view, are given (grey). (d) The average resting  $\text{Ca}^{2+}$  levels and the  $\text{Ca}^{2+}$  noise after microinjection of boar sperm extract or dye alone, compared with the same parameters from CHO cells in the same dish that were not injected (non-MI). In total, >40 injections were performed per coverslip ( $n=4$ ), and the efficacy of injection, determined by the visualization and retention of Alexa Fluor<sup>®</sup> 647 over the 20 min imaging period, exceeded 75%. All data in (c) and (d) are taken from cells that retained Alexa Fluor<sup>®</sup> 647 to levels of fluorescence >75% of initial values following the 20 min  $\text{Ca}^{2+}$  imaging window. In (e) a sample of the boar sperm extract mixed with an equal volume of Alexa Fluor<sup>®</sup> 647 that was microinjected into CHO cells was microinjected into unfertilized mouse eggs. The illustrated pattern of  $\text{Ca}^{2+}$  oscillations measured with rhodamine dextran fluorescence (F) was seen in 6/6 injected eggs.

microinjection of fluorescent tracer dye alone (Figures 7c and 7d). The same extracts caused high-frequency  $\text{Ca}^{2+}$  oscillations when injected into mouse eggs (Figure 7e); so these data suggest that CHO cells are not able to generate a response to native sperm PLC $\zeta$ , even when it is introduced directly by microinjection into their cytoplasm.

## DISCUSSION

Consistent with previous expression studies using Venus- or YFP-tagged PLC $\zeta$  in COS cells, we found that either YFP- or luciferase-PLC $\zeta$  could be expressed in CHO cells [12,13].

The previous reports of PLC $\zeta$  expression in non-gametes gave apparently contradictory results in that a study using cell lines showed that PLC $\zeta$  expression triggered Ca<sup>2+</sup> oscillations, whereas transgenic expression of PLC $\zeta$  throughout the mouse soma did not lead to any clear phenotypic change [15]. The PLC $\zeta$  transgenic whole soma expression levels were probably much lower than our studies with mammalian cell lines since we could readily detect expression, and yet expression in the transgenic mice was not detectable using a Venus–PLC $\zeta$  fusion protein [15]. Notably, our results indicate that readily detectable expression of two different PLC $\zeta$ -fusion proteins can be achieved in a cell line with no apparent perturbation of resting Ca<sup>2+</sup> levels, no major change in Ca<sup>2+</sup> homeostasis and no altered response to agonists that increases cytoplasmic Ca<sup>2+</sup>. The absence of any effect of expressed PLC $\zeta$  on cytoplasmic Ca<sup>2+</sup> is surprising since previous work implied that PLC $\zeta$  is autonomously activated inside cells. Moreover, our results also demonstrate that the PLC $\zeta$  expressed within CHO cells is either already active, or can subsequently become activated when it is assayed *in vitro* or introduced into eggs, thus implying that PLC $\zeta$  may be held in an inactive state in CHO cells. This is also consistent with our findings that cytosolic sperm extracts, which contain an endogenous active PLC $\zeta$  [1], were also incapable of causing any Ca<sup>2+</sup> release when directly microinjected into normal CHO cells.

Previous studies showing expression of mouse PLC $\zeta$  in somatic cells lines have reported either nuclear or cytoplasmic localization [12]. These observations could provide an explanation for some of the differences in the reported functional effects of PLC $\zeta$  expression. The results of the present study show that the specific localization of PLC $\zeta$  within cells may be dependent upon the elapsed time after transfection. We observed this time-dependence because in our studies we microinjected the plasmid DNA into cells, hence the timing of cDNA transduction was more precisely determined than with other methods. The localization of YFP–PLC $\zeta$  is primarily retained within the cytoplasm for the first 3–5 h after injection, and is subsequently found in the nucleus after 24 h. This time period should be sufficient for some cells to complete a cell cycle and hence may imply that differential localization occurs after a round of mitosis. It was of interest that YFP–<sup>D210R</sup>PLC $\zeta$  did not undergo any nuclear localization in CHO cells, which is similar to what we have seen in mouse eggs (Y. Yu and K. Swann, unpublished work). Since this mutant form of PLC $\zeta$  lacks the ability to bind its substrate, this may suggest that PIP<sub>2</sub> binding plays some role in nuclear translocation. Previous studies with Venus–PLC $\zeta$  shows that a rapid (<1 h) localization occurred in the nuclei of mouse zygotes and embryos [16,17], suggesting that the mouse PLC $\zeta$  expressed in CHO cells is either very slowly transported into the nucleus, or alternatively it may require a mitotic transit to become localized. In either case, the time-dependent localization we observe may explain the variation in previous reports of localization of PLC $\zeta$  that may be due to the uncertain time at which transcription starts using liposome-based methods. Nevertheless, the observed nuclear localization is unlikely to account for the lack of PLC $\zeta$  activity in CHO cells since as it occurs many hours after transfection and with high levels of YFP–PLC $\zeta$  protein expression, some cytoplasmic localization will invariably overlap with nuclear localization. In stably transfected YFP–PLC $\zeta$  cells there was also some variability in nuclear localization, but the homogeneity of Ca<sup>2+</sup> handling in all cells confirmed that nuclear sequestration cannot readily account for an apparent lack of activity of PLC $\zeta$  in cells.

Semi-quantitative estimates suggest that we have expressed relatively high levels of recombinant PLC $\zeta$  protein in CHO cells. From our previous calibration of luciferase expressed in mouse eggs [10], we can determine that the luminescence from

single CHO cells expressing PLC $\zeta$ -luc (~10 cps) corresponds to >100 fg of the fusion protein. We can also calculate the amount of YFP–PLC $\zeta$  protein present in our experiments. The amount of YFP–PLC $\zeta$  in the selected high-expression cells is at least 10-fold the detection threshold level, which is ~1  $\mu$ M [27]. So our levels should correspond to approximately 10  $\mu$ M. Given a CHO cell volume of ~2 pl, our transfected and selected cells should contain ~2 pg of YFP–PLC $\zeta$  protein (relative molecular mass ~100 kDa). The estimated ~2 pg/CHO cell is significantly greater than the 20–50 fg of PLC $\zeta$  that was previously shown to trigger a physiological pattern of Ca<sup>2+</sup> oscillations in mouse eggs [1]. Given that CHO cells are only ~1% of the volume of a mouse egg, it appears that CHO cells can tolerate expression levels of ~200-fold PLC $\zeta$ -luc and ~2000-fold YFP–PLC $\zeta$  higher than is required to cause IP<sub>3</sub>-dependent Ca<sup>2+</sup> oscillations in mouse eggs.

It is not clear why PLC $\zeta$  is apparently inactive in CHO cells. One possibility is that our transfected CHO cells have adapted to high levels of PLC $\zeta$  by down-regulating the number of IP<sub>3</sub> receptors. Given the high levels of expressed PLC $\zeta$ , this would amount to the effective ablation of IP<sub>3</sub> receptors. However, this seems unlikely to be occurring in our experiments because such down-regulation only occurs after generation of considerable amounts of IP<sub>3</sub> that are sufficient to cause high-frequency Ca<sup>2+</sup> oscillations [8,9]. Notably, we failed to detect any Ca<sup>2+</sup> changes, even at early times after transfection with PLC $\zeta$ . There is also insufficient time for IP<sub>3</sub> receptor down-regulation to explain the lack of response to the sperm extracts. Furthermore, any InsP<sub>3</sub> receptor down-regulation leads to a loss of agonist-induced Ca<sup>2+</sup> increase [28]. We did find that there was a reduction in the Ca<sup>2+</sup> response to low doses of ATP for stably transfected YFP–PLC $\zeta$  cells. However this effect was not related to the expression level of YFP–PLC $\zeta$ . It is also noteworthy that previous work on ATP-induced Ca<sup>2+</sup> response in CHO cells showed that PKC (protein kinase C) stimulation causes a marked feedback inhibition of Ca<sup>2+</sup> transients [29]. Therefore if PLC $\zeta$  was causing sustained PIP<sub>2</sub> hydrolysis and hence DAG (diacylglycerol) production, we would anticipate a substantial block of the ATP Ca<sup>2+</sup> transients. Since we consistently failed to detect any change in Ca<sup>2+</sup> response at high ATP concentrations, the simplest interpretation of our data is that the recombinant PLC $\zeta$  is inactivated when expressed in CHO cells.

The apparent lack of PLC $\zeta$  activity in transfected CHO cells, coupled with clear Ca<sup>2+</sup>-releasing activity when these cells are introduced into eggs, resembles the physiological situation with regards to fertilization. Given the size difference between the sperm and egg, the mammalian sperm should contain levels of PLC $\zeta$  that must be at least three orders of magnitude higher than is effective in causing Ca<sup>2+</sup> release in eggs. The mammalian sperm has a resting Ca<sup>2+</sup> level similar to that of other cells and can exhibit Ca<sup>2+</sup> increase in response to agonists, some of which appear to work via IP<sub>3</sub> generation [11]. This implies that the PLC $\zeta$  present in sperm is also inactive. However, PLC $\zeta$  is capable of causing the first Ca<sup>2+</sup> increase at fertilization within minutes of sperm–egg membrane fusion [30]. Therefore the experiments where we inject transfected CHO cells into the egg mimics the fertilization of the egg by a sperm in that an inactive PLC $\zeta$  rapidly becomes active upon exposure to the egg cytoplasm. The high intrinsic PLC activity of sperm extracts also resembles the high *in vitro* PLC activity we find in YFP–PLC $\zeta$ -transfected CHO cell cytosolic extracts. There may be two explanations for such effects. One is that PLC $\zeta$  may be held in an inactive state in sperm, and that whatever the mechanism the inhibitory components are also present in CHO cells. Otherwise the activity of PLC $\zeta$  observed upon entry into eggs could be because it interacts specifically with a protein(s) that is only expressed in the egg cytoplasm. This



possibility would be consistent with the fact that other known mammalian phosphoinositide-specific PLCs are also stimulated by interaction with accessory proteins [31].

## AUTHOR CONTRIBUTION

Sally Phillips carried out most of the experiments on CHO cells, and Yuansong Yu carried out experiments on eggs and some of the studies on CHO cells. Andreas Rossbach prepared the DNA constructs. Christopher George contributed to the analysis of confocal studies of CHO cells and microinjected extracts for Figure 7. Michail Nomikos conducted biochemical analysis of the PLC protein, and Vyronia Vassilakopoulou, Evangelia Livanou and Bevan Cumbe prepared the rabbit anti-PLC antibody. F. Anthony Lai contributed towards the conception of the project and drafting of the paper. Karl Swann supervised the project and prepared the final version of the paper.

## ACKNOWLEDGEMENTS

We thank Nazar Amso for his support of S.V.P. on the early part of this project.

## FUNDING

This work was supported by the Biotechnology and Biological Sciences Research Council [grant number BB/C513142/1]; Medical Research Council [grant number G0801676]; and the Wellcome Trust [grant number 080701/Z/06/Z]. V.V. holds a research scholarship from NCSR Demokritos.

## REFERENCES

- Saunders, C. M., Larman, M. G., Parrington, J., Cox, L. J., Royle, J., Blayney, L. M., Swann, K. and Lai, F. A. (2002) PLC $\zeta$ : a sperm-specific trigger of Ca<sup>2+</sup> oscillations in eggs and embryo development. *Development* **129**, 3533–3544
- Swann, K., Saunders, C. M., Rogers, N. and Lai, F. A. (2006) PLC $\zeta$ : a sperm protein that triggers Ca<sup>2+</sup> oscillations and egg activation in mammals. *Sem. Cell Dev. Biol.* **17**, 264–273
- Kouchi, Z., Fukami, K., Shikano, T., Oda, S., Nakamura, Y., Takenawa, T. and Miyazaki, S. (2004) Recombinant phospholipase C $\zeta$  has high Ca<sup>2+</sup> sensitivity and induces Ca<sup>2+</sup> oscillations in mouse eggs. *J. Biol. Chem.* **279**, 10408–10412
- Miyazaki, S. and Ito, M. (2006) Calcium signals for egg activation in mammals. *J. Pharm. Sci.* **100**, 545–552
- Kurakawa, M., Sato, K. and Fissore, R. A. (2004) Mammalian fertilization: from sperm factor to phospholipase C $\zeta$ . *Biol. Cell* **96**, 137–145
- Fujimoto, S., Yoshida, N., Fukui, T., Isobe, T., Itagaki, C., Izumi, T. and Perry, A. C. (2004) Mammalian phospholipase C $\zeta$  induces oocyte activation from the sperm perinuclear matrix. *Dev. Biol.* **274**, 370–383
- Knott, J. G., Kurokawa, M., Fissore, R. A., Schultz, R. M. and Williams, C. J. (2005) Transgenic RNAi reveals role for mouse sperm phospholipase C $\zeta$  in triggering Ca<sup>2+</sup> oscillations during fertilization. *Biol. Reprod.* **72**, 992–996
- Brind, S., Swann, K. and Carroll, J. (2000) Inositol 1,4,5-trisphosphate receptors are downregulated in mouse oocytes in response to sperm or adenophostin A but not to increases in intracellular Ca<sup>2+</sup> or egg activation. *Dev. Biol.* **223**, 251–265
- Jellerette, T., He, C. L., Wu, H., Parys, J. B. and Fissore, R. A. (2000) Down-regulation of the inositol 1,4,5-trisphosphate receptor in mouse eggs following fertilization or parthenogenetic activation. *Dev. Biol.* **223**, 238–250
- Nomikos, M., Blayney, L. M., Larman, M. G., Campbell, K., Rossbach, A., Saunders, C. M., Swann, K. and Lai, F. A. (2005) Role of phospholipase C- $\zeta$  domains in Ca<sup>2+</sup>-dependent phosphatidylinositol 4,5-bisphosphate hydrolysis and cytoplasmic Ca<sup>2+</sup> oscillations. *J. Biol. Chem.* **280**, 31011–31018
- Publicover, S. J., Giojalas, L. C., Teves, M. E., de Oliveira, G. S., Garcia, A. A., Barratt, C. L. and Harper, C. V. (2008) Ca<sup>2+</sup> signalling in the control of motility and guidance in mammalian sperm. *Front. Biosci.* **13**, 5623–5637
- Coward, K., Kubota, H., Hibbitt, O., McIlhinney, J., Kohri, K. and Parrington, J. (2006) Expression of a fluorescent recombinant form of sperm protein phospholipase C $\zeta$  in mouse epididymal sperm by *in vivo* gene transfer into the testis. *Fertil. Steril.* **85** (Suppl. 1), 1281–1289
- Kuroda, K., Ito, M., Shikano, T., Awaki, T., Yoda, A., Takeuchi, H., Kinoshita, K. and Miyazaki, S. (2006) The role of X/Y linker region and N-terminal EF hand domain in nuclear translocation and Ca<sup>2+</sup> oscillation-inducing activities of phospholipase C $\zeta$ , a mammalian egg-activating factor. *J. Biol. Chem.* **281**, 27794–27805
- Berrie, C. P., Cuthbertson, K. S., Parrington, J., Lai, F. A. and Swann, K. (1996) A cytosolic sperm factor triggers calcium oscillations in rat hepatocytes. *Biochem. J.* **313**, 369–372
- Yoshida, N., Amani, M., Kajikawa, E., Brahmajoyala, M., Iwahori, A., Nakano, Y., Shoji, S., Diebold, J., Hessel, H., Huss, R. and Perry, A. C. (2007) Borad, exoptic expression of the sperm protein PLCZ1 induces parthenogenesis and ovarian tumours in mice. *Development* **134**, 3941–3952
- Larman, M. G., Saunders, C. M., Carroll, J., Lai, F. A. and Swann, K. (2004) Cell cycle-dependent Ca<sup>2+</sup> oscillations in mouse embryos are regulated by nuclear targeting of PLC $\zeta$ . *J. Cell Sci.* **117**, 2513–2521
- Yoda, A., Oda, S., Shikano, T., Koucki, Z., Awaji, T., Shirakawa, H., Kinoshita, K. and Miyazaki, S. (2004) Ca<sup>2+</sup> oscillation-inducing phospholipase C $\zeta$  expressed in mouse eggs is accumulated to the pronucleus during egg activation. *Dev. Biol.* **268**, 245–257
- Ito, M., Shikano, T., Oda, S., Horiguchi, T., Tanimoto, S., Awaji, T., Mitani, H. and Miyazaki, S. (2008) Difference in Ca<sup>2+</sup> oscillation-inducing activity and nuclear translocation ability of PLCZ1, an egg-activating sperm factor candidate, between mouse, rat, human, and medaka fish. *Biol. Reprod.* **78**, 1081–1090
- Nash, M. S., Saunders, R., Young, K. W., Challiss, R. A. and Nahorski, S. R. (2001) Reassessment of the Ca<sup>2+</sup> sensing property of a type I metabotropic glutamate receptor by simultaneous measurements of inositol 1,4,5-trisphosphate and Ca<sup>2+</sup> in single cells. *J. Biol. Chem.* **276**, 19286–19293
- Swann, K., Campbell, K., Yu, Y., Saunders, C. and Lai, F. A. (2009) Use of luciferase chimera to monitor PLC $\zeta$  expression in mouse eggs. *Methods Mol. Biol.* **518**, 17–29
- Kishigami, S. and Wakayama, T. (2009) Somatic cell nuclear transfer in the mouse. *Methods Mol. Biol.* **518**, 207–218
- George, C. H., Higgs, G. V., Mackrill, J. J. and Lai, F. A. (2003) Dysregulated ryanodine receptors mediate cellular toxicity: restoration of normal phenotype by FKBP12.6. *J. Biol. Chem.* **278**, 28856–28864
- Thomas, D., Tovey, S. C., Collins, T. J., Bootman, M. D., Berridge, M. J. and Lipp, P. (2000) A comparison of fluorescent Ca<sup>2+</sup> indicator properties and their use in measuring elementary and global Ca<sup>2+</sup> signals. *Cell Calcium* **28**, 213–223
- George, C. H., Jundi, H., Walters, N., Thomas, N. L., West, R. R. and Lai, F. A. (2006) Arrhythmic mutation-linked defects in ryanodine receptor autoregulation reveal a novel mechanism of Ca<sup>2+</sup> release channel dysfunction. *Circ. Res.* **98**, 88–97
- Iredale, P. A. and Hill, S. J. (1993) Increases in intracellular calcium via activation of an endogenous P2-purinoceptor in cultured CHO-K1 cells. *Br. J. Pharmacol.* **110**, 1305–1310
- Parrington, J., Jones, K. T., Lai, F. A. and Swann, K. (1999) The soluble sperm factor that causes Ca<sup>2+</sup> release from sea urchin egg homogenates also triggers Ca<sup>2+</sup> oscillations after injection into mouse eggs. *Biochem. J.* **341**, 1–4
- Niswender, K. D., Blackman, S. M., Rohde, L., Magnuson, M. A. and Piston, D. W. (1995) Quantitative imaging of green fluorescent protein in cultured cells: comparison of microscopic techniques, use in fusion proteins and detection limits. *J. Microsc.* **180**, 109–116
- Wojcikiewicz, R. J., Furuichi, T., Nakade, S., Mikoshiba, K. and Nahorski, S. R. (1994) Muscarinic receptor activation down-regulates the type I inositol 1,4,5-trisphosphate receptor by accelerating its degradation. *J. Biol. Chem.* **269**, 7963–7969
- Strassheim, D. and Williams, C. L. (2000) P2Y<sub>2</sub> purinergic and M<sub>3</sub> muscarinic acetylcholine receptors activate different phospholipase C $\beta$  isoforms that are uniquely susceptible to protein kinase C dependent phosphorylation and inactivation. *J. Biol. Chem.* **275**, 39767–39772
- Lawrence, Y., Whitaker, M. and Swann, K. (1997) Sperm-egg fusion is the prelude to the initial Ca<sup>2+</sup> increase at fertilization in the mouse. *Development* **124**, 223–241
- Suh, P.G., Park, J. I., Manzoli, L., Cocco, L., Peak, J. C., Katan, M., Fukami, K., Kataoka, T., Yun, S. and Ryu, S. H. (2008) Multiple roles of phosphoinositide-specific phospholipase C isozymes. *BMB Rep.* **41**, 415–433

## SUPPLEMENTARY ONLINE DATA

# Divergent effect of mammalian PLC $\zeta$ in generating Ca<sup>2+</sup> oscillations in somatic cells compared with eggs

Sally V. PHILLIPS<sup>\*1</sup>, Yuansong YU<sup>\*1</sup>, Andreas ROSSBACH<sup>†</sup>, Michail NOMIKOS<sup>†‡</sup>, Vyronia VASSILAKOPOULOU<sup>‡</sup>, Evangelia LIVANIOU<sup>‡</sup>, Bevan CUMBES<sup>†</sup>, F. Anthony LAI<sup>†</sup>, Christopher H. GEORGE<sup>†</sup> and Karl SWANN<sup>\*2</sup>

<sup>\*</sup>Department of Obstetrics and Gynaecology, School of Medicine, Cardiff University, Heath Park, Cardiff CF14 4XN, U.K., <sup>†</sup>Department of Cardiology, School of Medicine, Cardiff University, Heath Park, Cardiff CF14 4XN, U.K., and <sup>‡</sup>IRRP, National Center for Scientific Research, 'Demokritos' Athens, Greece

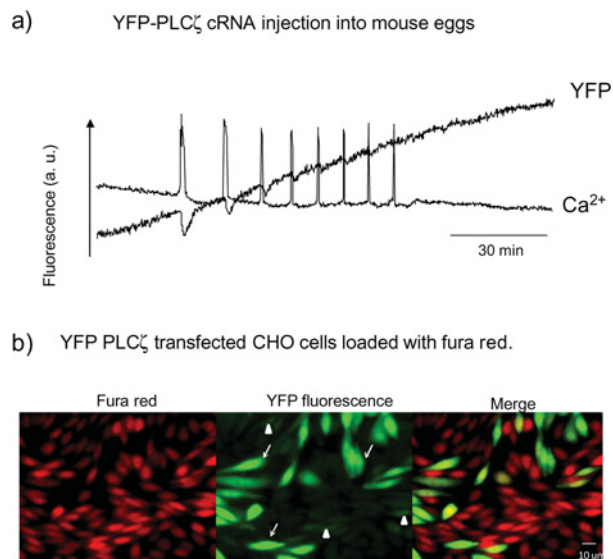

**Figure S1 YFP-PLC $\zeta$  in mouse eggs and CHO cells**

(a) YFP-PLC $\zeta$  cRNA injection into mouse eggs. (b) YFP-PLC $\zeta$ -transfected CHO cells loaded with fura red. The arrows show transfected CHO cells with a high level of YFP-PLC $\zeta$  (fluorescence intensity,  $0.12 \pm 0.004/\text{pixel}$ ); and the arrowheads show transfected CHO cells expressing a low level of YFP-PLC $\zeta$  (fluorescence intensity,  $0.06 \pm 0.003/\text{pixel}$ ).

Received 27 September 2010/31 May 2011; accepted 22 June 2011  
Published as BJ Immediate Publication 22 June 2011, doi:10.1042/BJ20101581

<sup>1</sup> These authors contributed equally to this work.

<sup>2</sup> To whom correspondence should be addressed (email swannk1@cardiff.ac.uk).
